# Supplementary material
Source: PubMed Central journal article supplement (PMC4311800)
Supplement: pnas.201413877SI.pdf [file pnas.201413877SI.pdf]

# Supporting Information

Staller et al. 10.1073/pnas.1413877112

## Supplemental Note 1

We controlled for several factors that may confound model performance when models are fit to WT data and used to predict patterns in *bcd* RNAi. When building gene expression atlases, gene expression levels are normalized separately in each atlas, so changes in TF levels between genotypes are obscured. In WT the gap genes express at similar levels (1), but their relative levels may be different in *bcd* RNAi. We controlled for this possibility in several ways. First, to simulate changes in level between genotypes we systematically scaled the levels of each gene in *bcd* RNAi, one at a time, and measured model performance. For the pattern driven by the *eve3+7* reporter the repressor-only model was more accurate than the bifunctional model for all tested scalings of Hb and a very large range of scalings of the other

regulators (Fig. S4). Analogously, for the endogenous pattern the bifunctional model always outperformed the repressor-only model as we scaled *kni* and *tll* levels (Fig. S4). For Hb the bifunctional model was more accurate than the repressor-only model so long as Hb levels in *bcd* RNAi were less than 135% of WT (Fig. S4). Because *hb* levels are reduced in *bcd* mutant embryos (2), Hb levels in *bcd* RNAi are almost certainly below this level. Second, we refit the models in *bcd* RNAi and predicted *bcd* RNAi output patterns, testing whether an optimal set of parameters could change the relative predictive performance of the models, but it did not for  $T = 3-6$  (Fig. S5). Third, when we refit the models on both datasets simultaneously and predicted *bcd* RNAi patterns the relative order of model performance did not change for  $T = 3-6$  (Fig. S5).

1. Little SC, Tikhonov M, Gregor T (2013) Precise developmental gene expression arises from globally stochastic transcriptional activity. *Cell* 154(4):789–800.

2. Driever W, Nüsslein-Volhard C (1989) The bicoid protein is a positive regulator of hunchback transcription in the early *Drosophila* embryo. *Nature* 337(6203):138–143.



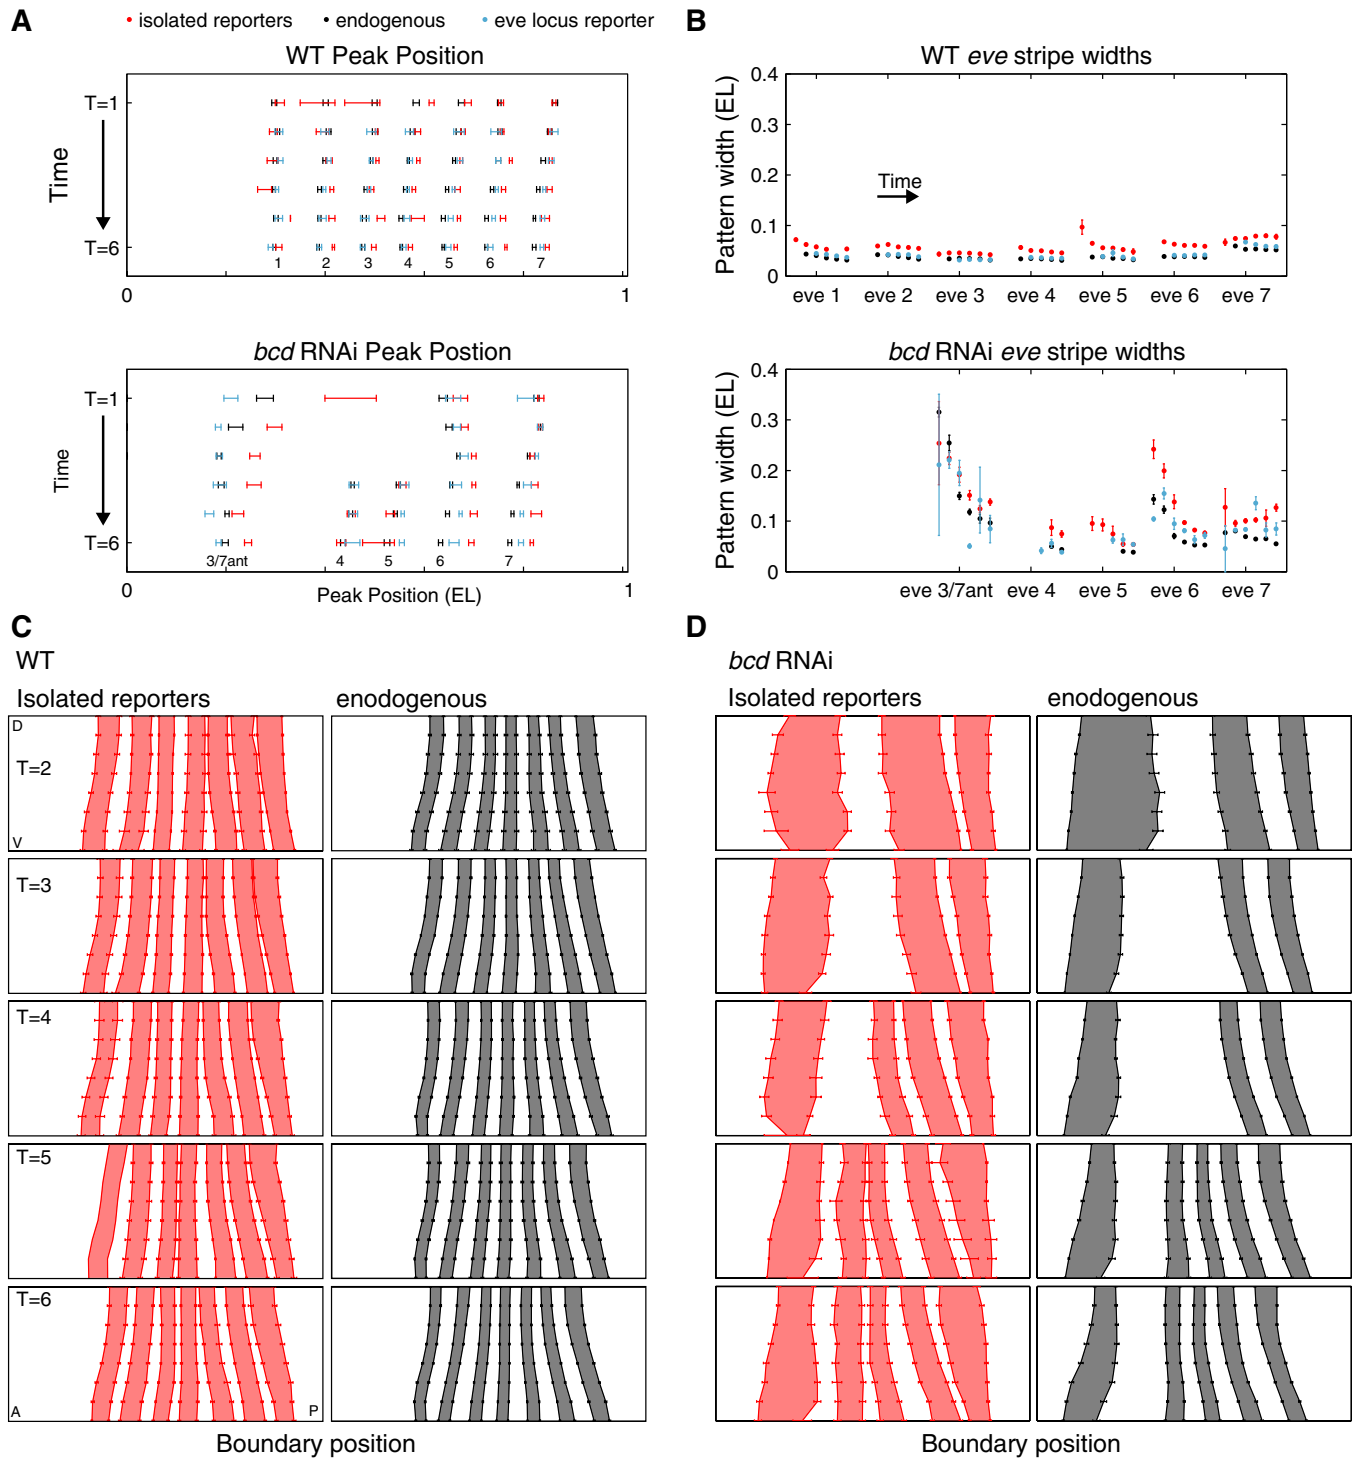

**Fig. S2.** The expression pattern driven by the whole locus reporter is more similar to the endogenous pattern than the traditional reporters. (A) The reporter peak positions (red) are slightly posterior to the endogenous eve peaks (black) and whole locus reporter peaks (blue). Peak positions calculated from lateral line traces in Fig. S1. The anterior *eve*3+7 pattern is faint and broad at T = 1 and the peak is close to the middle of the embryo as seen in the lateral line trace in Fig. S1. (B) Stripes driven by the traditional reporters (red) are wider than endogenous stripes (black) and whole locus reporter (blue) in WT and *bcd* RNAi. Widths calculated from lateral line traces in Fig. S1. In WT some of the error bars are smaller than the diameter of the point. (C and D) Boundary positions of the traditional reporters (red) and endogenous stripes (gray) in WT (C) and *bcd* RNAi (D). Note that the ventral-most part of the *eve*3+7 reporter anterior pattern is very faint in *bcd* RNAi embryos and this boundary is not reliably detected by our software.



**Repressor-only model**

$$\mu = 12 - 9[\text{hb}] - 59[\text{kni}] - 31[\text{tll}] - 31[\text{gt}]$$

**Bifunctional model**

$$\mu = -9 + 116[\text{hb}] - 51[\text{kni}] - 26[\text{tll}] - 212[\text{hb}^2]$$

**WT**

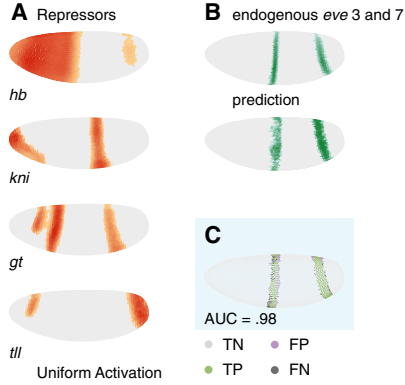

**WT**

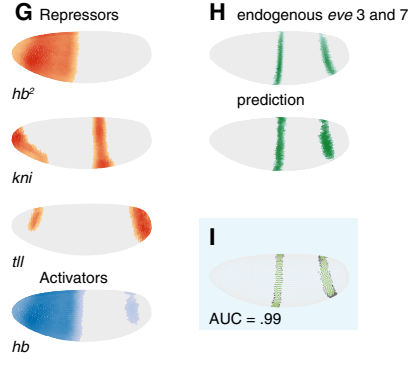

**bcd RNAi**

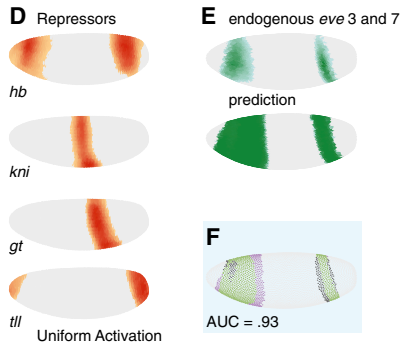

**bcd RNAi**

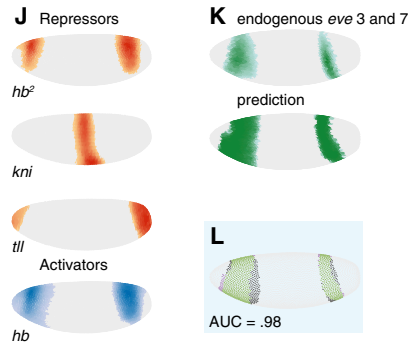

**Fig. 54.** Under perturbation of *bcd*, the expression patterns of endogenous *eve* stripes 3 and 7 are more accurately predicted by the bifunctional model. (A) WT expression patterns of the regulators in the repressor-only model. The expression level of each TF is shown for every cell. Cells with expression below an ON/OFF threshold (*Materials and Methods*) are plotted in gray. For cells above this threshold, color intensity represents expression level. Repressors are red and activators are blue. (B) The expression pattern of the endogenous *eve* stripes 3 and 7 and the predictions of the repressor-only model in WT. (C) Comparison of predictions to measurement in WT embryos. Green cells are true positives (TP), purple cells are false positives (FP), dark gray cells are false negatives (FN), and light gray cells are true negatives (TN). For visualization, the threshold is set to 80% sensitivity, but the AUC metric quantifies performance over all thresholds. (D) The expression patterns of the regulators in the repressor-only model in *bcd* RNAi embryos. (E) The expression pattern of the endogenous *eve* stripes 3 and 7 and the predictions of the repressor-only model in *bcd* RNAi. (F) Comparison of repressor-only model predictions to data in *bcd* RNAi. (G–L) Same as A–F, respectively, for the bifunctional model.









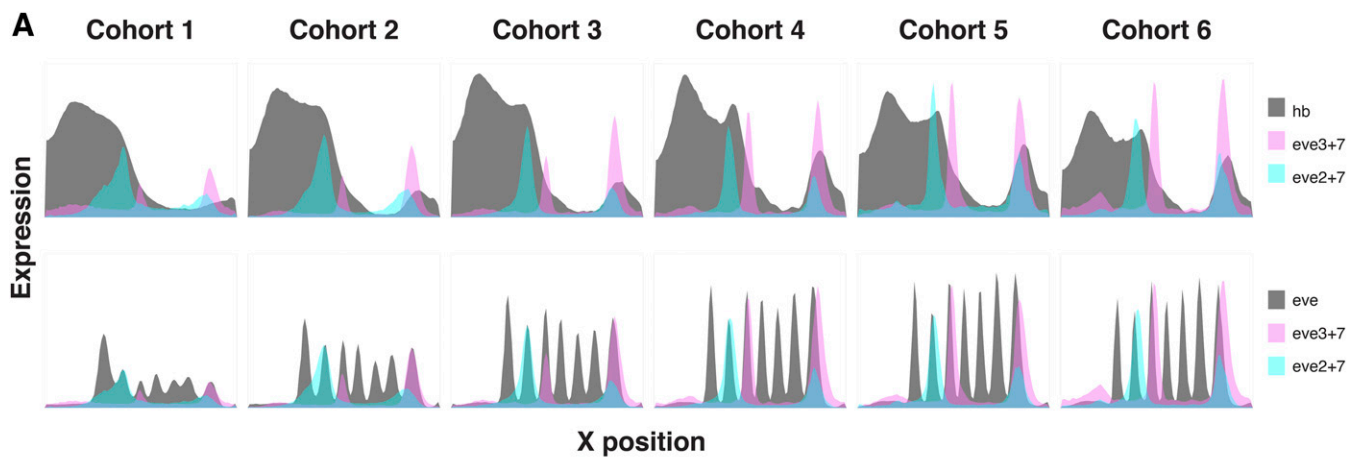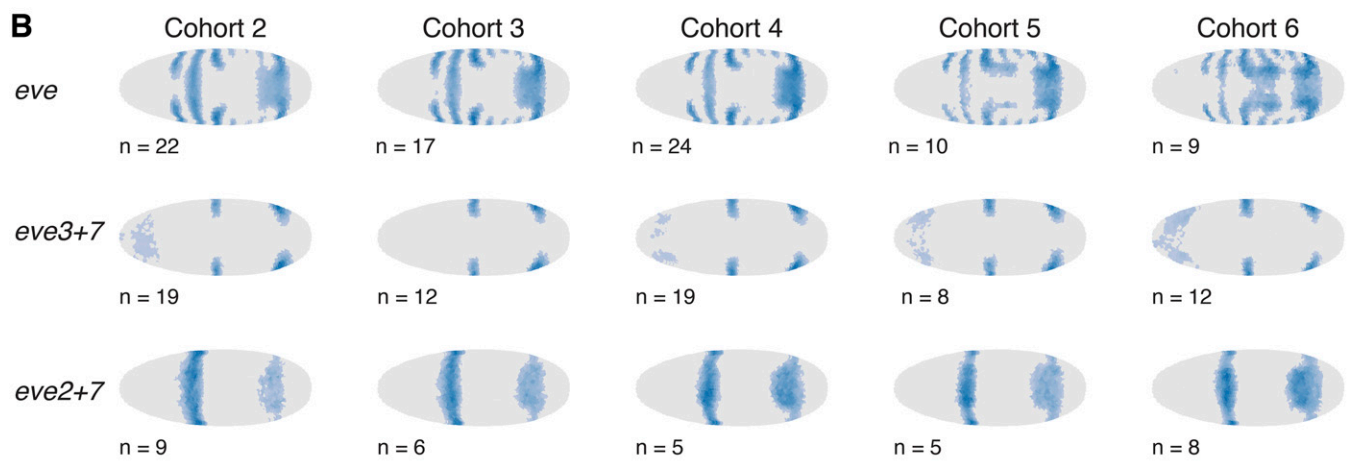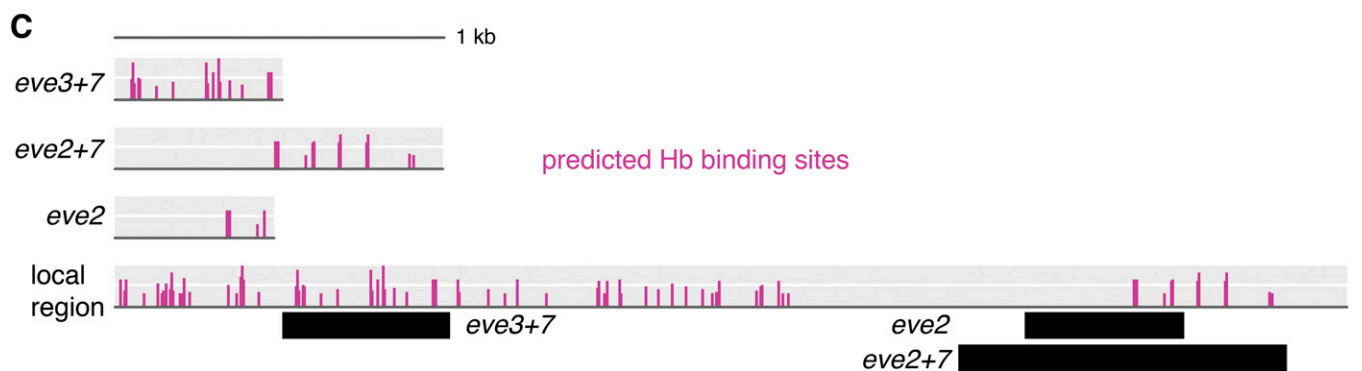

**Fig. S8.** There are quantitative differences between the *eve* stripe 7 shadow enhancers. (A) Line traces of Hb protein, *eve3+7*, and *eve2+7* show how Hb overlaps stripe 7 (*Top*). Line traces of *eve*, *eve3+7*, and *eve2+7* show neither reporter perfectly matches the endogenous pattern (*Bottom*). (B) Computational renderings of gene expression atlas data from *sna::hb* embryos. The number of embryos included in each time point of the gene expression atlas is shown. (C) Predicted Hb binding sites (calculated as in Fig. S7).

**Table S1. Model parameters**

|                                                   | Time | Linear   |           |            |            |           | Quadratic |           |            |            |                        |
|---------------------------------------------------|------|----------|-----------|------------|------------|-----------|-----------|-----------|------------|------------|------------------------|
|                                                   |      | Constant | <i>hb</i> | <i>kni</i> | <i>tll</i> | <i>gt</i> | Constant  | <i>hb</i> | <i>kni</i> | <i>tll</i> | <i>hb</i> <sup>2</sup> |
| Endogenous                                        | 2    | 5        | -5        | -21        | -9         | -15       | -5        | 68        | -22        | -7         | -134                   |
| <i>hb</i> protein                                 | 3    | 12       | -9        | -59        | -31        | -31       | -9        | 116       | -51        | -26        | -212                   |
| Other mRNA                                        | 4    | 11       | -5        | -40        | -51        | -27       | -9        | 101       | -42        | -67        | -137                   |
|                                                   | 5    | 5        | -2        | -17        | -25        | -14       | -7        | 73        | -26        | -49        | -95                    |
|                                                   | 6    | 10       | -4        | -48        | -37        | -33       | 2         | 49        | -50        | -58        | -77                    |
| Endogenous                                        | 3    | 12       | -9        | -59        | -31        | -31       | -9        | 116       | -51        | -26        | -212                   |
| llsley et al. (1)<br>(includes <i>gt</i> protein) | 3    | 11       | -10       | -66        | -22        | -13       | -8        | 110       | -45        | -25        | -201                   |
| Reporter                                          | 2    | 6        | -6        | -30        | -6         | -16       | -3        | 64        | -37        | -4         | -134                   |
| <i>hb</i> protein                                 | 3    | 12       | -11       | -72        | -18        | -29       | -10       | 145       | -73        | -14        | -286                   |
| Other mRNA                                        | 4    | 11       | -7        | -37        | -22        | -43       | -13       | 105       | -25        | -16        | -144                   |
|                                                   | 5    | 4        | -1        | -13        | -14        | -15       | -12       | 83        | -15        | -22        | -103                   |
|                                                   | 6    | 8        | -4        | -26        | -22        | -40       | -5        | 59        | -19        | -23        | -91                    |

1. Ilsley GR, Fisher J, Apweiler R, DePace AH, Luscombe NM (2013) Cellular resolution models for even skipped regulation in the entire *Drosophila* embryo. *eLife* 2:e00522.

**Table S2. AUC scores**

| T = 3           | Linear            |        | Quadratic         |        |
|-----------------|-------------------|--------|-------------------|--------|
|                 | llsley et al. (1) | Refit  | llsley et al. (1) | Refit  |
| WT              | 0.9622            | 0.9786 | 0.9874            | 0.9874 |
| <i>bcd</i> RNAi | 0.9321            | 0.9275 | 0.985             | 0.9849 |

1. Ilsley GR, Fisher J, Apweiler R, DePace AH, Luscombe NM (2013) Cellular resolution models for even skipped regulation in the entire *Drosophila* embryo. *eLife* 2:e00522.

**Table S3. Enhancer reporter sequences and primers used to generate them**

| Construct     | Enhancer sequence                                                                                                                                                                                                                                                                                                                                                                                                                                                                                                                                                                                                                                                                                                                                                                                                                                                                                          | Source | Primer sequences                                     |
|---------------|------------------------------------------------------------------------------------------------------------------------------------------------------------------------------------------------------------------------------------------------------------------------------------------------------------------------------------------------------------------------------------------------------------------------------------------------------------------------------------------------------------------------------------------------------------------------------------------------------------------------------------------------------------------------------------------------------------------------------------------------------------------------------------------------------------------------------------------------------------------------------------------------------------|--------|------------------------------------------------------|
| <i>eve1</i>   | aggcctaatacacttccctgaaatgcataattgtgcccgcgcttttgata-<br>cgctcctggcggagaggagatgaggaaaggatgcacgggaaccgca-<br>gccaagtggcagtcgagattggcaaatccgccagcggacaatgcca-<br>gagaatgggcaacaagtagcgcgcaattagcaatcctatcatgcttt-<br>tatggccggccaactcttgcccgcgcatctcagttcatccgaagg-<br>gaccaggtccaggttcaagtcgaggtccagtagccctgctatcccgt-<br>caaccctttaggcgataatccttctaaatggttgcatattttcg-<br>aggcgtggacggattagggcgtgctggctggcggaaccgcagcag-<br>aaaccgcgaggaactgcaccgactgacctgcagcctacagatctc-<br>tgatcttcgatctcctaactccttcgcatctgcaactgactctcgac-<br>tgggtccgcccctaactcctccgcgagaaggcggcagagtcgag-<br>gtactggccgggtaatgggattatctgcgattacccagatgatc-<br>cgcagaagtcaatctggttcaggggctaattgtcagcgaagtcaac-<br>taaatccaatcctttcgccccctctctgtttatgtttgttttcg-<br>ttgttttgagaatttctggcaataaagttgcccgttttgatgccc-<br>ggggcggtgcatcaaatccttcgcataccctgtcctgcacaaatg-<br>ctgaattccgcatcccattggataccagatattcagatattccaaaggc                | 1      | aggcctaatacacttccctg<br>GCCTGGGATATCTGAAT-<br>ATCTGG |
| <i>eve4+6</i> | aggatccctgggctctgggctctggactatccgccgaccctccatacc-<br>atgatttacaattctogtttttttcgcggtatttttttaggggctt-<br>aatgaccgctgtaaaagccgagggaccaggaccaggactctgctc-<br>acatttcggcactgattctaaaaaatgaaatcattttttcttgaat-<br>ttcagcggcgcctcagcagagactctttgttctcggccaggcaatt-<br>gtccttttttcgctcagctctcagtttttttcgctccagcggcatta-<br>cctacacggcgttttatggcggagatgatattcgctgggactcggtt-<br>ccgtttttaggccataaaaattaggcggcataaaaaactgcattg-<br>gaattctagttctagtttcaagttttaggtttccaggtttctgcc-<br>gcccgcctagattcgcatttcgcggaattcggaaagcgggaacagaatg-<br>ccagaatggtcagaatcctggctgaccttgccttttgccagggcc-<br>gtaaaaaattgactcgcctgcggtgcgcggaataatttttaaactg-<br>actttccaacaactctctgatctgggttcgaatcgtaaaaaaaagca-<br>gaacaaaaagcggcattttcgtcggcaaatgatctgttaatggcc-<br>gggctaaaaaactaaagtcacaaagtcacaagggtgtccggtaaatg-<br>accgggttaagaatgtctgtctgtaccgagaaggatgcaggacattc-<br>agcattcaaaagctcccaccgctcgaaggattccccgaagattcac        | 1      | aggatccctgggctctg<br>GTGAATCTTCGGGGGAATCC            |
| <i>eve5</i>   | atatcccaaggccgcaaaagtcacaagtcggcagcaaatccctttgt-<br>ccggcgtggttttttttttagccataactcgtgcattgtttggg-<br>ccaagtttttctctgccaattgcggagatgatgcgggattatgc-<br>gctgattgctgcaattatggacatcctgcgagccccgaggaactt-<br>cctgctaaatcctttcatccgctacagaaccctttgtgtcccgtt-<br>gcccgggagtccttgacgggtccttcgactattcgcttacagcagct-<br>tgctaaaaatttcataaccctacgagcggctcttcgcggaatccct-<br>ggcattatcctttttacctcttgccaatccgttggtcaaaaaacggc-<br>ttcgacttcccgttaactgctggacaacaaagcaaaaaacggcgaa-<br>aggacggcagatttccaggtagcattgcgaattccgtcaaacataagg-<br>accggttataaacgggtttatatggccagaatctctgcattctccac-<br>gaccgcagaagctgcgtaaaactgcaggctctgttttgatttctgc-<br>aacttcagtttaattgcccgggatggccagcaattgcggcaattata-<br>aaacagcgcagatgtgactcagcttccatatactaaactctatactca-<br>tgccgaaaaatctagggtggggagcggaggggggggtgctgggtga-<br>cttgccctgccagggaaaggggggggggttcagcgggtgataaatgt-<br>gctgattttggaatgaatgcgcatcgattaaaaccgcagggcaatca-<br>at | 1      | atatcccaaggccgcaaa<br>AAATTGATTGCCCTGCGGT            |
| <i>eve3+7</i> | GGATCCTCGAAATCGAGAGCgacctcgtgcattagaaaactagatcag-<br>ttttttgttttggccgaccgatttttgtcccggctgctctcttaccg-<br>gtttatggccgcttccatttcccagctctcttggctccgggctcag-<br>aaatctgtatggaattatggatatagcagatttttatgggtcccggc-<br>gatccggttcgcggaacgggagtgctcctccgcgagaggtcctcgc-<br>ggcagatccttgcgccgtattaggaagtagatcacgtttttttgtt-<br>cccattgtgcgctttttcgtcgcgctagttttttccccgaacc-<br>gcaactgctcctaattttttaaattctcaccggcttttcatgggctc-<br>ctggaaaaacgggacaaggttataacgctctacttacctgcaattg-<br>tgccataaactcgcactgctctcgtttttaaagaccgtttgtttgtg-<br>ttgtttgtccgcatgacgattcagcttttttacgagctc                                                                                                                                                                                                                                                                                                                                   | 2      | GGATCCTCGAAATCGAGAGC<br>GAGCTCGTAAAAACGTGAATGC       |

**Table S3. Cont.**

| Construct       | Enhancer sequence                                                                                                                                                                                                                                                                                                                                                                                                                                                                                                                                                                                                                                                                                                                                                                                                                                                                                                                                                                                                                                                                                                           | Source                                                          | Primer sequences                             |
|-----------------|-----------------------------------------------------------------------------------------------------------------------------------------------------------------------------------------------------------------------------------------------------------------------------------------------------------------------------------------------------------------------------------------------------------------------------------------------------------------------------------------------------------------------------------------------------------------------------------------------------------------------------------------------------------------------------------------------------------------------------------------------------------------------------------------------------------------------------------------------------------------------------------------------------------------------------------------------------------------------------------------------------------------------------------------------------------------------------------------------------------------------------|-----------------------------------------------------------------|----------------------------------------------|
| eve2            | ggttaccggctactgcataacaatggaaccggaaccgtaactgggacag-<br>atcgaaaagctggcctggtttctcgctggtgtgcccgtgtaatccg-<br>tttgccatcagcgagattattagtcattgacgttgcagcggtttccg-<br>tttctgctcgtttcactttcgagttagactttattgcagcatcttg-<br>aacaatcgctcgagtttggaacacgctgtgccatactttcatttag-<br>acggaatcgagggaccctggactataatcgcaaacgagaccgggtt-<br>gcaagtcagggcatctccgccgacttagccatcgccatcttctgagg-<br>gctttgtttgtttgttctgctgggattagccaagggctgacttgga-<br>atccaatcccgatccctagcccgatcccaatccaatccaatccct-<br>tgtccttttcattagaaagtcataaaaacacataataatGATGTCGA-<br>AGGGATTAGGGG                                                                                                                                                                                                                                                                                                                                                                                                                                                                                                                                                                             | 3                                                               | ggttaccggctactgcataac<br>CCCTAATCCCTTCGACATC |
| eve2+7          | agaaggcttgcatgtgggcctttccaggctggccagtaggtagagttg-<br>ttgcatgctggcgtatgccggcgagttaatgccaatgcaaattgccc-<br>gccaatataaccataatattgaagtaactggcaggagcgaggtat-<br>ccttccctggttaccgggactgcatataacaatggaaccggaaccgtaa-<br>ctgggacagatcgaaaagctggcctggtttctcgctggtgtgcccgt-<br>gttaatccggtttgccatcagcgagattattagtcattgacgttgcag-<br>gcttttcgctttctgctcgtttcactttcgagttagactttattgc-<br>agcatctgaacaatcgctcgagtttggaacacgctgtgccatact-<br>ttcatttagacggaatcgagggaccctggactataatcgcaaacgga-<br>gaccgggttgcaagtcagggcattccgccgacttagccatcgccat-<br>cttctgcccggctttgtttgtttgttctgctgggattagccaagggct-<br>tgacttggaaatccaatccTgatccctagcccgatcccaatccaatc-<br>ccttctccttttcattagaaagtcataaaaacacataataatgatgt-<br>cgaagggattagggcgccaggtccaggcaacgcaat taacggact-<br>agcgaactgggtatttttttgcgcccacttagccctgatccgag-<br>cttaaccggttttgagccggcagcaggttagttgtgggtggaccaca-<br>cgattttttggcacaacctccaagctaacttgcgcaagtggaagt-<br>ggccgggtttgctggccaaaagaggagcactatcccggctcctggtta-<br>cagttggtacgctgggaatgattatataatcacaataaataatgttttgc-<br>ccaacgaaaccgaaaacttttcaaatagtcggaactgggttc-<br>ccattttccattttccatgttctgcccagggcgccattatctc-<br>gct | This work                                                       | agaaggcttgcatgtggg<br>agcgagataatggccgc      |
| BAC whole locus | Beginning -6.4 kb upstream of eve transcription start site (TSS) and ending 11.3 kb downstream of eve TSS. The eve coding sequence has been replaced with <i>LacZ</i> and the neighboring <i>TER94</i> gene has been fused to GFP.                                                                                                                                                                                                                                                                                                                                                                                                                                                                                                                                                                                                                                                                                                                                                                                                                                                                                          | Gift from M. Fujioka, Thomas Jefferson University, Philadelphia |                                              |

The eve2+7 enhancer spans 998 bp including the entire minimal eve2 enhancer, but none of the eve3+7 enhancer (Fig. S6). Late in this work we noticed this construct had a 1-bp polymorphism and a 6-bp deletion in the minimal eve2 region, but neither of these defects affects any of the foot-printed binding sites (3, 4).

1. Fujioka M, Emi-Sarker Y, Yusibova GL, Goto T, Jaynes JB (1999) Analysis of an even-skipped rescue transgene reveals both composite and discrete neuronal and early blastoderm enhancers, and multi-stripe positioning by gap gene repressor gradients. *Development* 126(11):2527–2538.
2. Small S, Blair A, Levine M (1996) Regulation of two pair-rule stripes by a single enhancer in the *Drosophila* embryo. *Dev Biol* 175(2):314–324.
3. Small S, Kraut R, Hoey T, Warrior R, Levine M (1991) Transcriptional regulation of a pair-rule stripe in *Drosophila*. *Genes Dev* 5(5):827–839.
4. Small S, Blair A, Levine M (1992) Regulation of even-skipped stripe 2 in the *Drosophila* embryo. *EMBO J* 11(11):4047–4057.
